# Supplementary material for: Ion-Exclusion/Cation-Exchange Chromatography Using Dual-Ion-Exchange Groups for Simultaneous Determination of Inorganic Ionic Nutrients in Fertilizer Solution Samples for the Management of Hydroponic Culture
Source: MDPI journal article supplement (doi:10.3390/agronomy11091847), 2021-09-15
Supplement: s1 [file s1]

Article

# Ion-exclusion/cation-exchange chromatography using dual-ion-exchange groups for simultaneous determination of inorganic ionic nutrients in fertilizer solution samples for the management of hydroponic culture

Daisuke Kozaki<sup>\*1</sup>, Yuki Sago<sup>2</sup>, Taku Fujiwara<sup>3</sup>, Yuta Mitsui<sup>1</sup>, Chihiro Kubono<sup>1</sup>, Tougo Koga<sup>1</sup>, Tomotaka Tachibana<sup>1</sup> and Masanobu Mori<sup>1</sup>,

<sup>1</sup> Department of Chemistry and Biotechnology, Faculty of Science and Technology, Kochi University, 2-5-1 Akebono-cho, Kochi city, Kochi, 780-8520, Japan

<sup>2</sup> Graduate School of Sciences and Technology for Innovation, Yamaguchi University, Yoshida 1677-1 Yamaguchi, 753-8515, Japan

<sup>3</sup> Department of Environmental Engineering, Kyoto University, C1-222, Nishikyo-ku, Kyoto 615-8540, Japan

\* Correspondence: daisuke.2-10@kochi-u.ac.jp

## Supplementary Materials

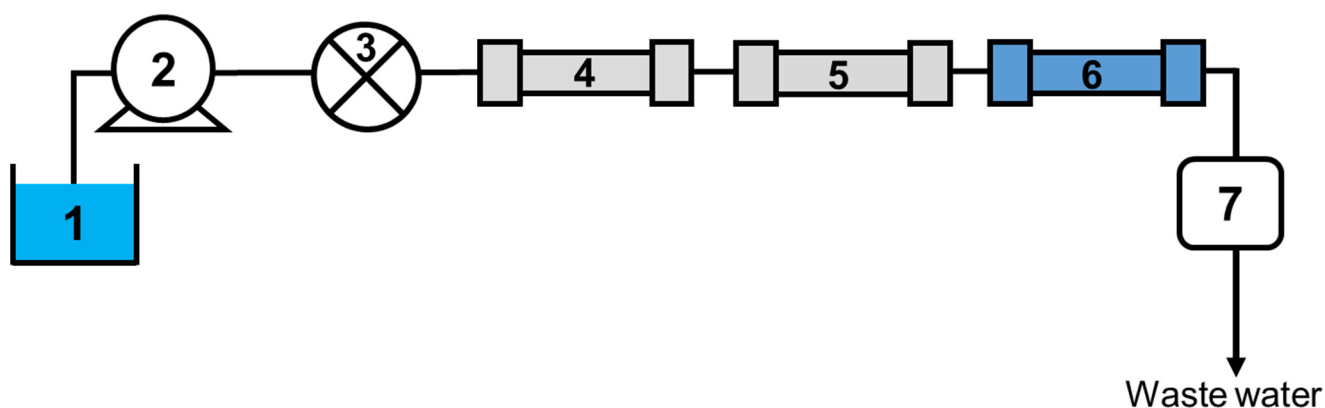

**Figure S1** Schematic illustration of the proposed chromatographic system. 1: Eluent bottle, 2: eluent pump, 3: sample injector, 4 and 5: weakly-acidic cation exchange columns, 6: size-exclusion column, 7: conductivity detector (CD).

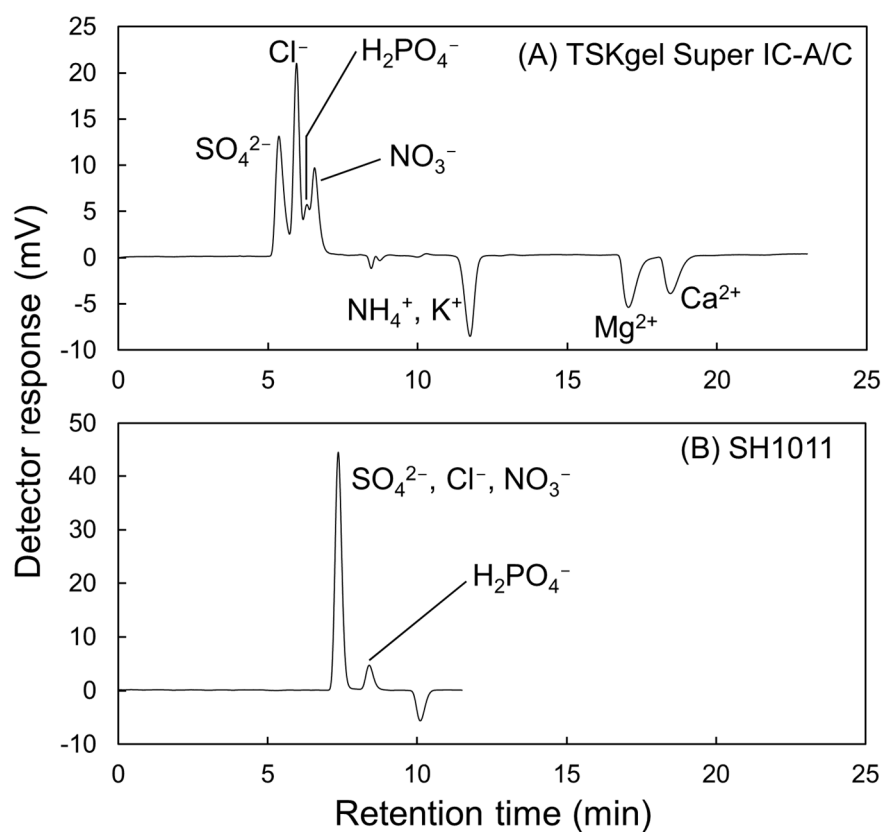

**Figure S2** Separation of analyte ions using single ion-exchange group. Separation column (functional group): (A) TSKgel Super IC-A/C (carboxy group), and (B) SUGAR SH1011 (sulfo group); column temperature, 55 °C; injection volume, 5.0 µL; eluent concentration, 5 mM tartaric acid; eluent flow rate, 1.0 mL/min. Injected samples: a mixture of 1.0 mM MgSO<sub>4</sub>, NaCl, NH<sub>4</sub>NO<sub>3</sub>, KH<sub>2</sub>PO<sub>4</sub>, and CaCl<sub>2</sub>.

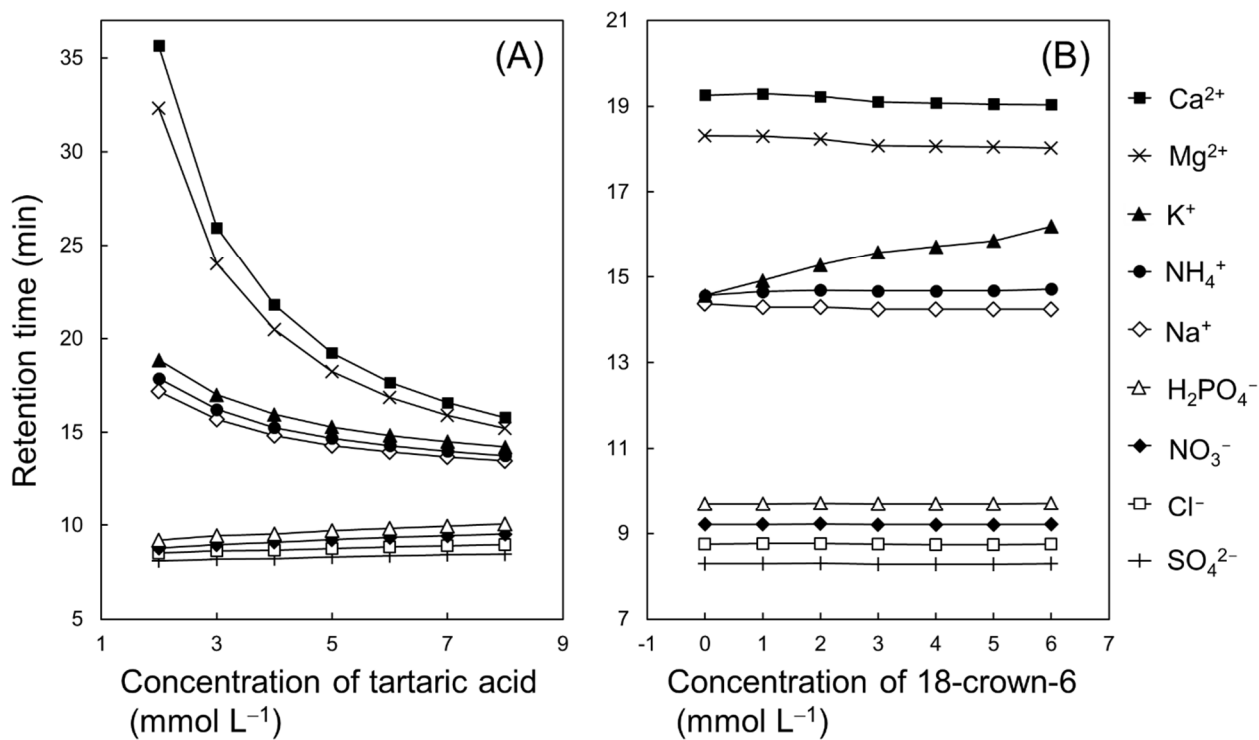

**Figure S3** Effect of (A) tartaric acid concentration and (B) 18-crown-6 concentration on the retention time of the analyte ions. The experimental conditions are the same as in Figure S2.

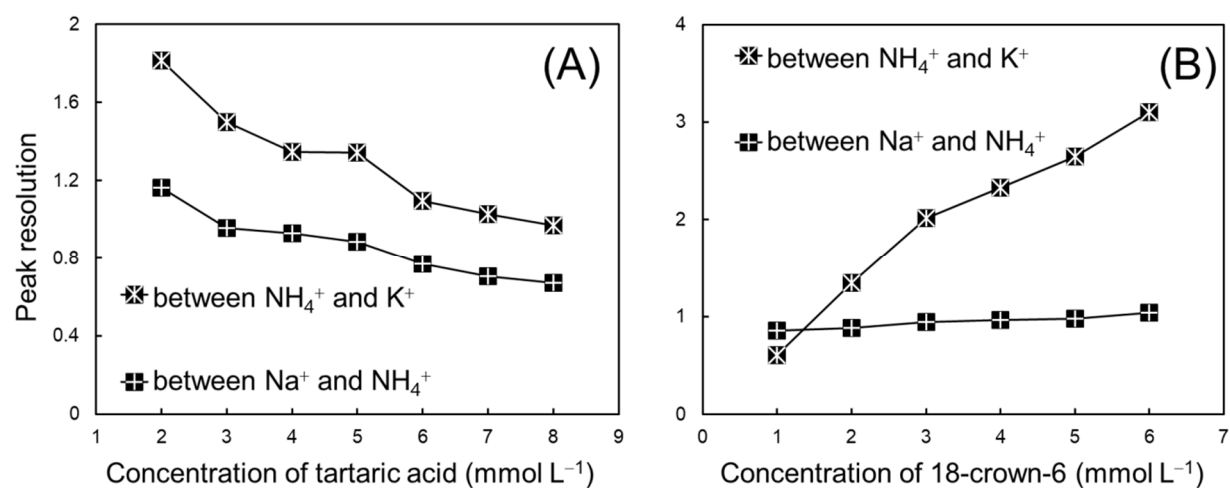

**Figure S4** Effect of (A) tartaric acid concentration, and (B) 18-crown-6 concentration on the resolution of Na<sup>+</sup>, NH<sub>4</sub><sup>+</sup>, and K<sup>+</sup>. The experimental conditions are the same as in Figure S3.

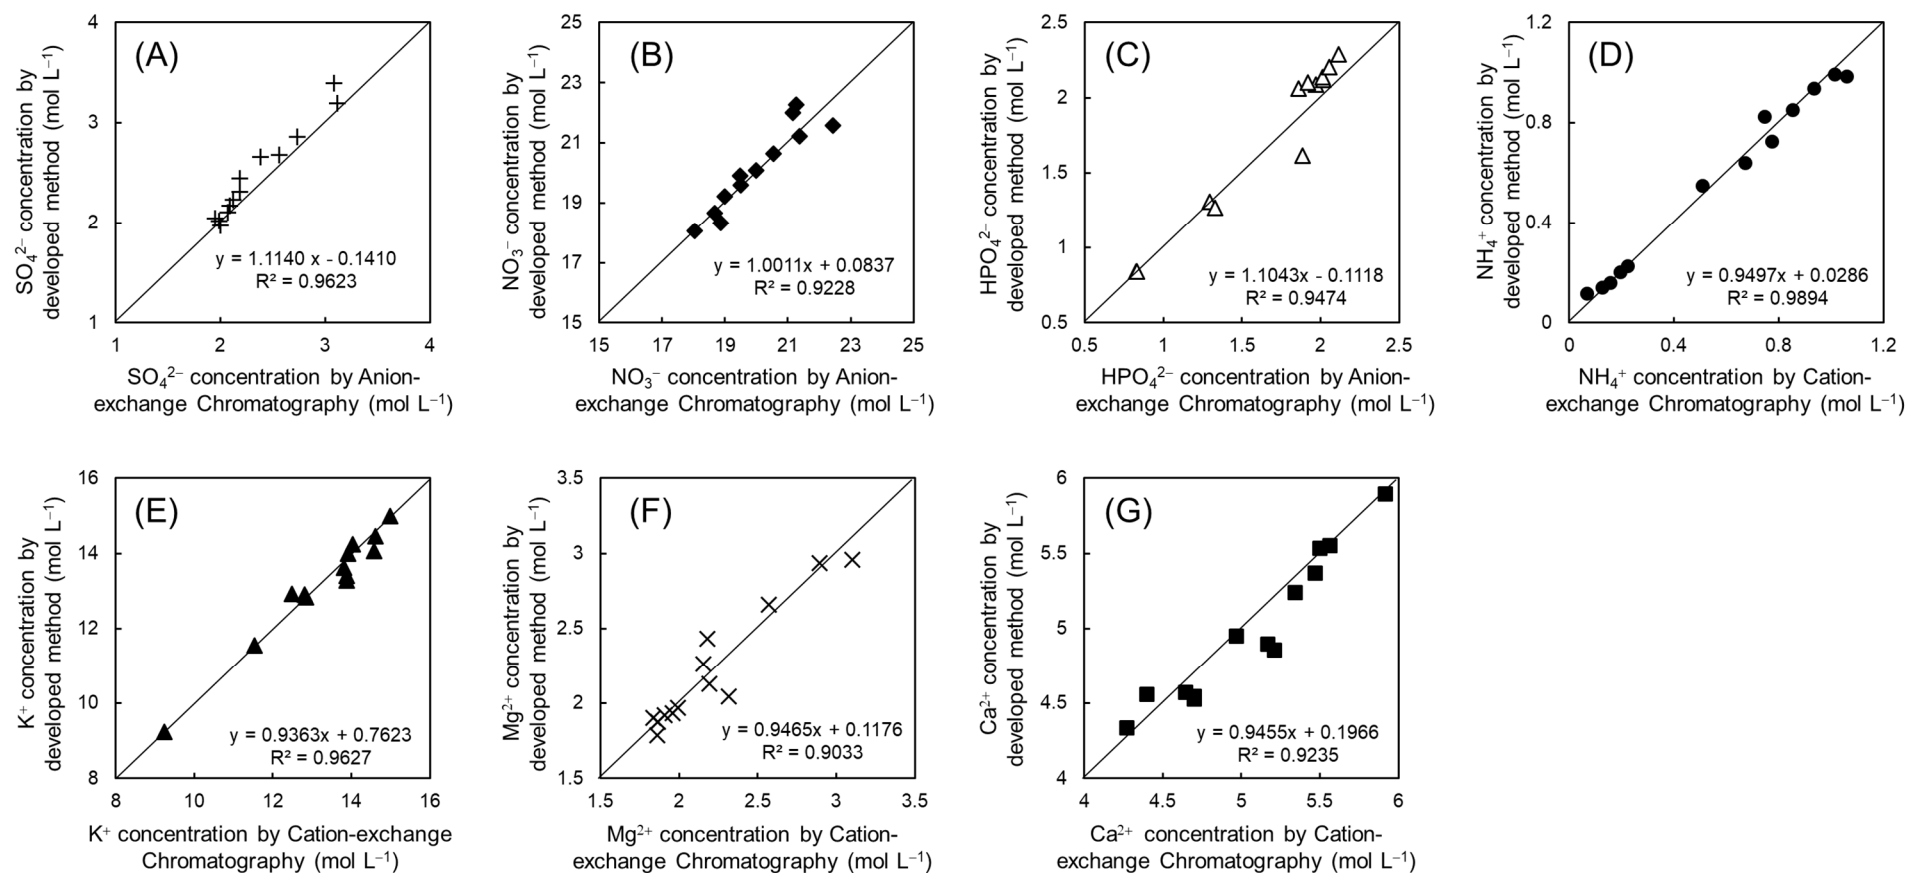

**Figure S5** Comparison of the analyte ion concentration obtained from the developed method and the conventional ion-exchange chromatographic method. Analytes: (A)  $\text{SO}_4^{2-}$ , (B)  $\text{NO}_3^-$ , (C)  $\text{H}_2\text{PO}_4^-$ , (D)  $\text{NH}_4^+$ , (E)  $\text{K}^+$ , (F)  $\text{Mg}^{2+}$ , (G)  $\text{Ca}^{2+}$ . The experimental conditions were the same as those in Figure 2.

**Table S1** Analyte performance under optimal conditions.

| Analyte                   | Retention time,<br>min | RSD, % ( <i>n</i> = 5) |           |             | LoD, $\mu\text{M}$<br>(S/N = 3.3) | LoQ, $\mu\text{M}$<br>(S/N = 10) | Linearity range,<br>mM | Correlation coefficient,<br>$R^2$ | Additional recovery,<br>% |
|---------------------------|------------------------|------------------------|-----------|-------------|-----------------------------------|----------------------------------|------------------------|-----------------------------------|---------------------------|
|                           |                        | Retention time         | Peak area | Peak height |                                   |                                  |                        |                                   |                           |
| $\text{SO}_4^{2-}$        | 8.27                   | 0.0494                 | 0.243     | 0.318       | 7.89                              | 23.9                             | 0.125–1.00             | 0.9996                            | 104                       |
| $\text{Cl}^-$             | 8.78                   | 0.0465                 | 0.174     | 0.289       | 17.3                              | 52.3                             | 0.375–3.00             | 0.9999                            | 97.6                      |
| $\text{NO}_3^-$           | 9.17                   | 0.0563                 | 0.324     | 0.353       | 10.6                              | 32.0                             | 0.125–1.00             | 0.9998                            | 105                       |
| $\text{H}_2\text{PO}_4^-$ | 9.72                   | 0.0420                 | 0.709     | 0.533       | 22.6                              | 68.4                             | 0.125–1.00             | 0.9999                            | 96.7                      |
| $\text{Na}^+$             | 14.3                   | 0.0857                 | 2.59      | 1.93        | 86.3                              | 262                              | 0.125–1.00             | 0.9995                            | 101                       |
| $\text{NH}_4^+$           | 14.7                   | 0.0277                 | 2.50      | 1.72        | 84.3                              | 255                              | 0.125–1.00             | 0.9997                            | 102                       |
| $\text{K}^+$              | 15.6                   | 0.0262                 | 0.840     | 0.856       | 25.7                              | 77.8                             | 0.125–1.00             | 0.9999                            | 98.1                      |
| $\text{Mg}^{2+}$          | 18.1                   | 0.0699                 | 2.20      | 2.75        | 66.7                              | 202                              | 0.125–1.00             | 0.9999                            | 105                       |
| $\text{Ca}^{2+}$          | 19.1                   | 0.0838                 | 1.53      | 2.63        | 51.5                              | 156                              | 0.125–1.00             | 0.9981                            | 98.5                      |

The experimental conditions are the same as in Figure 2.

**Table S2** Analytical results for 12 fertilizer solution samples collected during the hydroponic cultivation.

| Date of hydroponic cultivation              | Analyte concentration (mol) |      |      |      |      |      |      |       |       |       |       |       |
|---------------------------------------------|-----------------------------|------|------|------|------|------|------|-------|-------|-------|-------|-------|
|                                             | 0                           | 4    | 7    | 9    | 11   | 14   | 16   | 18    | 21    | 23    | 25    | 28    |
| Water volume                                | 4.00                        | 3.53 | 3.39 | 3.29 | 3.17 | 3.00 | 2.82 | 2.56  | 2.04  | 1.72  | 3.12  | 2.24  |
| Height of edible part                       | 0.00                        | 1.29 | 2.01 | 2.62 | 2.70 | 5.67 | 6.73 | 7.71  | 9.61  | 10.5  | 12.3  | 14.0  |
| SO <sub>4</sub> <sup>2-</sup>               | 7.79                        | 7.02 | 7.02 | 6.87 | 6.72 | 6.56 | 6.17 | 6.10  | 5.58  | 5.30  | 7.98  | 6.97  |
| Cl <sup>-</sup>                             | N.D.*                       | N.D.  | N.D.  | N.D.  | N.D.  | N.D.  |
| NO <sub>3</sub> <sup>-</sup>                | 73.3                        | 65.9 | 66.1 | 64.1 | 63.4 | 61.6 | 60.3 | 57.4  | 43.4  | 36.4  | 59.3  | 40.4  |
| H <sub>2</sub> PO <sub>4</sub> <sup>-</sup> | 7.74                        | 6.56 | 6.68 | 6.31 | 6.39 | 6.04 | 5.80 | 5.41  | 2.64  | 1.42  | 4.14  | 1.86  |
| Na <sup>+</sup>                             | N.D.*                       | N.D.  | N.D.  | N.D.  | N.D.  | N.D.  |
| NH <sub>4</sub> <sup>+</sup>                | 3.42                        | 3.02 | 2.53 | 3.49 | 2.46 | 2.02 | 1.44 | 0.577 | 0.320 | 0.337 | 0.401 | 0.152 |
| K <sup>+</sup>                              | 48.9                        | 45.3 | 47.6 | 45.7 | 43.8 | 41.7 | 41.1 | 37.4  | 30.6  | 23.9  | 36.0  | 20.7  |
| Mg <sup>2+</sup>                            | 8.29                        | 6.58 | 6.46 | 6.45 | 6.32 | 6.95 | 6.18 | 5.51  | 5.24  | 5.34  | 6.80  | 6.49  |
| Ca <sup>2+</sup>                            | 18.1                        | 15.5 | 15.9 | 15.3 | 16.5 | 15.5 | 14.0 | 13.7  | 11.2  | 9.4   | 17.4  | 13.3  |

\*N.D., not detected

The experimental conditions are the same as those in Figure 3.
